# Supplementary material for: Metabolic Engineering of the Isopentenol Utilization Pathway Enhanced the Production of Terpenoids in Chlamydomonas reinhardtii
Source: MDPI journal article supplement (doi:10.3390/md20090577), 2022-09-15
Supplement: s1 [file s1]

## Sheet: Sheet1
Table S1. Primers used for qRT-PCR.
Name	Primer direction	Sequence	Utility
Actin	sense	ACCCCGTGCTGCTGACTG	qRT-PCR
	antisense	ACGTTGAAGGTCTCGAACG
ScCK	sense	CATCGAGAAAGTGGACCAAT
	antisense	GCTCCAGTTCTCGCATAG
AtIPK	sense	ATGAGCCCCTTTAGCTGC
	antisense	GCCGCTGTCTATGGTCTT
IDI	sense	ACGACGACGAGGTGATGGACTAC
	antisense	GCGGTTGGTGGCTTGCATCA
MsLS	sense	GAGCCTGCTGAGCGACTACA
	antisense	GATCTGGTCCGTCTCCTTCTCC
Primers used for construction of vectors.
Name	Primer direction	Sequence	Utility
1	sense	aagatcgagggcagggatatcATGGTACAAGAGTCCCGCCC	Primers were used for constraction of YFP_ScCK
2	antisense	ctgcgggtggctccagaattcTTACAGGTAGCTGGTGTCCAGGA
3	sense	aagatcgagggcagggatatcATGGAGCTTAACATCTCCGAGTCG	Primers were used for constraction of CFP_AtIPK
4	antisense	ctgcgggtggctccagaattcTTACTTGCTGAATCGGATGATGG
5	sense	gtccgcgccgaggctggatccATGGTACAAGAGTCCCGCCC	Primers were used for constraction of ScCK_YFP
6	antisense	cttgctcacgacgtcagatctGGAGCCGCTGCCGCTGCC
7	sense	gtccgcgccgaggctggatccATGGAGCTTAACATCTCCGAGTCG	Primers were used for constraction of AtIPK_CFP
8	antisense	gccctcgatgacgtcagatctGCTGCCGCTGCCCTTGCT
9	sense	gtccgcgccgaggctggatccATGGTACAAGAGTCCCGCCC	Primers were used for constraction of ScCK_AtIPK_YFP
10	antisense	atgttaagctccatGGAGCCGCTGCCGCTGCC
11	sense	ggctccATGGAGCTTAACATCTCCGAGTCG
12	antisense	cttgctcacgacgtcagatctGCTGCCGCTGCCCTTGCT
13	sense	gtccgcgccgaggctggatccATGGAGCTTAACATCTCCGAGTCG	Primers were used for constraction of AtIPK_ScCK_YFP
14	antisense	tcttgtaccatGCTGCCGCTGCCCTTGCT
15	sense	agcggcagcATGGTACAAGAGTCCCGCCC
16	antisense	cttgctcacgacgtcagatctGGAGCCGCTGCCGCTGCC
5	sense	gtccgcgccgaggctggatccATGGTACAAGAGTCCCGCCC	Primers were used for constraction of ScCK_YFP_AtIPK
6	antisense	cttgctcacgacgtcagatctGGAGCCGCTGCCGCTGCC
3	sense	aagatcgagggcagggatatcATGGAGCTTAACATCTCCGAGTCG
4	antisense	ctgcgggtggctccagaattcTTACTTGCTGAATCGGATGATGG
7	sense	gtccgcgccgaggctggatccATGGAGCTTAACATCTCCGAGTCG	Primers were used for constraction of AtIPK_CFP_ScCK
8	antisense	gccctcgatgacgtcagatctGCTGCCGCTGCCCTTGCT
1	sense	aagatcgagggcagggatatcATGGTACAAGAGTCCCGCCC
2	antisense	ctgcgggtggctccagaattcTTACAGGTAGCTGGTGTCCAGGA
152	sense	gtccgcgccgaggctggatccATGCGCCGCAGCGGCAAC	Primers were used for constraction of MsLS_aadA
151	antisense	gccctcgatgacgtcagatctGGAGCCGCTGCCGCTGCC
63	sense	gtccgcgccgaggctggatccATGCAGACCGAGCACGTGA	Primers were used for constraction of IDI_RFP
70	antisense	gccctcgatgacgtcagatctGCTGCCGCTGCCCTTCAG
