# Supplementary material for: Metabolic Engineering of the Isopentenol Utilization Pathway Enhanced the Production of Terpenoids in Chlamydomonas reinhardtii
Source: MDPI journal article supplement (doi:10.3390/md20090577), 2022-09-15
Supplement: s1 [file s1]

**Table S2.** List of codon-optimized, intron-containing nucleotide sequences of *ScCK*, *AtIPK*, *IDI*, and *MsLS*.

***ScCK***

ATGGTACAAGAGTCCCGCCCCGGCTCCGTCCGCTCCTACTCCGTCCGATAC  
 CAGgtgagtcgacgagcaagccccggcgatcaggcagcgtgcttgagatttgacttgcaacccccgattgtgtcga  
 cgaaggcttttggctcctctgtcgtgtgtcgaagcagcatctaaccctgcgtcgccgtttccatttgagGCCCCGCTCG  
 CGCTCCTCCTCTCAACGAAGACACTCCCTGACCCGCCAGCGAAGCAGCCA  
 GCGCCTGATCCGCACCATCAGCATCGAGAGCGACGTCAGCAACATCACCG  
 ACGACGACGACCTGCGCGCCGTGAACGAGGGCGTGGCCGGCGTGCAACT  
 GGACGTCAGCGAGACCGCCAACAAGGGCCCCCGCCGCGCCAGCGCCACC  
 GACGTGACCGATAGCCTGGGAAGCACCAGTAGCGAGTACATCGAGATCCC  
 CTTCGTGAAGGAGACCCTGGACGCCAGCCTGCCAAGCGACTACCTGAAGC  
 AAGACATCCTGAACCTGATCCAGAGCCTGAAGATCAGCAAGTGGTACAAC  
 AACAAGAAGATCCAGCCCGTGGCCCAAGACATGAACCTAGTGAAGATCAG  
 CGgtgagtcgacgagcaagccccggcgatcaggcagcgtgcttgagatttgacttgcaacccccgattgtgtcga  
 aaggcttttggctcctctgtcgtgtgtcgaagcagcatctaaccctgcgtcgccgtttccatttgagGCGCCATGAC  
 CAACGCCATCTTCAAGGTGGAGTACCCCAAGCTGCCAAGCCTGCTGCTGC  
 GCATCTACGGCCCCAACATCGACAACATCATCGACCGCGAATACGAGCTGC  
 AAATCCTGGCCCGCCTGAGCCTGAAGAACATCGGACCCAGCCTATACGGCT  
 GCTTCGTGAACGGCCGCTTCGAACAGTTCCTGGAGAACAGCAAGACCCTG  
 ACCAAGGACGACATCCGCAACTGGAAGAACAGCCAGCGCATCGCCCGCCG  
 CATGAAGGAGCTGCACGTCGGCGTGCCCTGCTGAGTAGCGAGCGCAAGA  
 ACGGAAGCGCCTGCTGGCAAAGATCAACCAGTGGCTGCGCACCATCGAG  
 AAAGTGGACCAATGGGTTGgtgagtcgacgagcaagccccggcgatcaggcagcgtgcttgagattt  
 gacttgcaacccccgattgtgtcgaaggaaggcttttggctcctctgtcgtgtgtcgaagcagcatctaaccctgcgtcgcc  
 ttccatttgagGCGACCCCAAGAACATCGAGAACAGCCTGCTATGCGAGAACTG  
 GAGCAAGTTCATGGACATCGTGGACCGCTACCACAAGTGGCTGATAAGCC  
 AGGAGCAAGGCATCGAGCAAGTGAACAAGAACCTGATCTTCTGCCACAAC  
 GACGCCCAATACGGCAACCTGCTGTTACCGCCCCCGTGATGAACACCCCA  
 AGCCTGTACACCGCCCCAAGTAGCACCAGCCTGACCAGCCAAAGCAGTAG  
 CCTGTTCCCAAGTAGTAGCAACGTGATCGTGGACGACATCATCAACCCCCC  
 CAAGCAAGAGCAGAGCCAGGACAGCAAGCTGGTAGTGATCGACTTCGAAT  
 ACGCCGGCGCCAACCCCGCCGCCTACGACCTGGCCAACCACTGAGCGAG  
 TGGATGTACGACTACAACAACGCCAAGgtgagtcgacgagcaagccccggcgatcaggcagc  
 gtgcttgagatttgacttgcaacccccgattgtgtcgaaggaaggcttttggctcctctgtcgtgtgtcgaagcagcatcta  
 accctgcgtcgccgtttccatttgagGCCCCCACCAGTGCCACGCCGACCGCTACCCCGA  
 CAAGGAGCAAGTGCTGAACTTCCTGTATAGCTACGTCAGCCACCTGCGCGG  
 CGGCGCCAAGGAGCCCATCGACGAGGAAGTGCAACGCCTGTACAAGAGC  
 ATAATCCAGTGGCGCCCCACCGTGCAACTGTTCTGGAGCCTATGGGCCATC  
 CTGCAAAGCGGAAAGCTGGAGAAGAAGGAGGCCAGCACCGCCATCACCC  
 GCGAGGAGATCGGCCCAACGGAAAGAAGTACATCATCAAGACCGAGCCC  
 GAGAGCCCCGAGGAGGACTTCGTGGAGAACGACGACGAGCCCGAGGCCG  
 GCGTCAGCATCGACACCTTCGACTACATGGCCTACGGCCGCGACAAGATCG  
 CCGTGTTCGTgtgagcttgccgggttgagcaaacactccagcaacgaacagtgcccaagtcaggaatctgag

tcagcctgggctttcggcggtttttcttgggcaaacagcttgcaactcatgccagcgcggcttgtccagcctcacttgagcttt  
ccagctgctaccagccgggctatacgacagcgacagagccatagcgtggaatcacttatttgggttgccgaagtagcggg  
cggagcgtgagttcttggtaagccgccccctatccggttctgtccgtgtcttgtccctcgttcacccctcgcggcacccttc  
atcccccttgcttgagGGGCGACCTGATCGGCCTGGGCATCATCACCGAGGAGGAGT  
GCAAGAACTTCAGTAGCTTCAAGTTCCTGGACACCAGCTACCTGtaaGCGG

### ***AIIPK***

ATGGAGCTTAACATCTCCGAGTCGCGTTCCCGAAGCATTTCGCTGCATTGTC  
AAGCTGGGAGGCGCCGCCATCACCTGCAAGAACGAGCTGgtgagtcgacgagcaag  
ccccgggatcaggcagcgtgcttgagatttgacttgcaacgcccgcattgtgtcgacgaaggcttttggctcctctgtcg  
ctgtctcaagcagcatctaaccctgcgtcgccgtttccatttgagGAGAAGATCCACGACGAGAACC  
TGGAGGTGGTGGCCTGCCAGCTGCGCCAGGCCATGCTGGAAGGCAGCGCC  
CCAAGCAAAGTGATCGGCATGGACTGGAGCAAGCGCCCCGGAAGCAGCG  
AGATCAGCTGCGACGTGGACGACATCGGCGACCAGAAAAGCAGCGAGTTC  
AGCAAGTTCGTGGTAGTGCACGGCGCCGGAAGCTTCGGCCACTTCCAAGC  
CAGCCGAAGCGGCGTGCACAAGGGCGGCCTGGAGAAGCCCATCGTGAAG  
GCCGGCTTCGTGGCCACCCGCATCAGCGTGACCAACCTGAACCTGGAGAT  
CGTCCGCGCCCTGGCCCCGCGAGGGGCATCCCCACCATCGGCATGAGCCCCTT  
TAGCTGCGGCTGGAGCACCAAGCGCGACGTGgtgagtcgacgagcaagccccggcg  
gatcaggcagcgtgcttgagatttgacttgcaacgcccgcattgtgtcgacgaaggcttttggctcctctgtcgctgtctcaa  
gcagcatctaaccctgcgtcgccgtttccatttgagGCCAGCGCCGACCTGGCCACCGTGGCCA  
AGACCATAGACAGCGGCTTCGTGCCCCGTGCTGCACGGCGACGCCGTGCTG  
GACAACATCCTGGGCTGCACCATCCTGAGCGGCGACGTGATCATCCGCCAC  
CTGGCCGACCACCTGAAGCCCGAATACGTGGTGTTCCTGACCGACGTGCTG  
GGCGTGTACGACCGCCCCCAAGCCCAAGCGAGCCCGACGCCGTGCTGCT  
GAAGGAGATCGCCGTGCGAGAGGACGGAAGCTGGAAGGTAGTGAACCCC  
CTGCTGGAGCACACCGACAAGAAAGTGGACTATAGCGTGGCCGCCCACGA  
CACCACCGGCGGCATGGAGACCAAGATCAGCGAGGCCGCCATGATCGCCA  
AGCTGGGCGTGGACGTGTACATCGTGAAGgtgagcttgcggggttgcgagcaaacactccagca  
acgaacagtgcceaagtcaggaatctgcagtcagcctgggctttcggcggtttttcttgggcaaacagcttgcaactcatgc  
cagcgcggcttgtccagcctcacttgagctttccagctgctaccagccgggctatacgacagcgacagagccatagcgtg  
gaatcacttatttgggttgccgaagtagcggtcggagcgtgagttcttggtaagccgccccctatccggttctgtccgtgtc  
tttgcctcgttcacccctcgcggcacccttcaccccttgcttgagGCCGCCACCACACATAGCCAGC  
GCGCCCTGAACGGCGACCTGCGCGACAGCGTGCCCGAGGACTGGCTGGGC  
ACCATCATCCGATTCAGCAAGtaaGCGG

### ***IDI***

ATGCAGACCGAGCACGTGATCCTGCTGAACGCCCAAGGAGTGCCCAACCGG  
AACGTTGGAGAAATACGCCGCCACACCGCGGACACCCGGCTGCACCTGgt  
gagtcgacgagcaagccccggcgatcaggcagcgtgcttgagatttgacttgcaacgcccgcattgtgtcgacgaagg  
cttttggctcctctgtcgctgtctcaagcagcatctaaccctgcgtcgccgtttccatttgagGCCTTTAGTAGCT  
GGCTGTTCAACGCCAAGGGCCAGCTGCTAGTGACCCGCCGCGCCCTGAGC  
AAGAAGGCCTGGCCCGGCGTGTGGACAAACAGCGTATGCGGCCACCCCCA  
ACTGGGAGAGAGCAACGAGGACGCCGTGATCCGCCGCTGCCGCTACGAGC

TGGGCGTGGAGATCACCCCCCCCCGAGAGCATCTACCCCGACTTCCGCTACC  
GCGCCACCGACCCAAGCGGCATCGTGGAGAACGAGGTCTGCCCCGTGTTC  
GCCGCCCCGACCAACCAGCGCCCTGCAAATCAACGACGACGAGGTGATGGA  
CTACCAGTGGTGTGACCTGGCCGACGTGCTGCACGgtgagcttgcggggtgcgagcaa  
cactccagcaacgaacagtgcccaagtcaggaatctgcagtcagcctgggctttcggcgcttttcttgggcaaacagctt  
gcactcatgccagcgcggcttgtccagcctcacttgagctttccagctgctaccagccgggctatacgacagcgacagag  
ccatagcgtggaatcacttatttgggttgcggaagtagcggtcggagcgtgagttcttggtaagccgccccctatccggttc  
ctgtccgtgtcttcttgcctcgttcacccttcgcggcacccttcatcccttgccttgagGCATCGACGCCACCC  
CCTGGGCCTTTAGCCCCCTGGATGGTGTATGCAAGCCACCAACCGCGAGGCC  
GCAAGCGCCTGAGCGCCTTCACCCAACCTGAAGtaaGCGG

### ***MsLS***

ATGGAGTTCCGCGTGCACCTGCAGGCCGACAACGAGCAGAAGATTTTCCA  
GAACCAGATGAAGCCCGAGCCCGAGgtgagtcgacgagcaagccccggcgatcaggcagcgtg  
cttgcagatttgacttgcaacgccccgattgtgtcgacgaaggcttttggctcctctgtcgctgtctcaagcagcatctaacc  
tgctcgccgtttccatttgagGCCAGCTACCTGATCAACCAGCGCCGCAGCGCCAACT  
ACAAGCCCAACATCTGGAAGAACGACTTCCTGGACCAGAGCCTGATCAGC  
AAGTACGACGGCGACGAGTACCGCAAGCTGAGCGAGAAGCTGATCGAGG  
AGGTGAAGATTTACATCAGCGCCGAGACGATGGACCTGGTGGCCAAGCTG  
GAGCTGATCGACAGCGTTCGCAAGCTGGGCCTGGCCAACCTGTTTCGAGAA  
GGAGATCAAGGAGGCCCTGGACAGCATCGCCGCCATCGAGAGCGACAACC  
TGGGCACCCGCGACGACCTGTACGGCACCGCCCTGCACTTCAAGATCCTGC  
GCCAGCACGGCTACAAGGTGAGCCAGGACATCTTCGGCCGCTTCATGGAC  
GAGAAGgtgagtcgacgagcaagccccggcgatcaggcagcgtgcttgcagatttgacttgcaacgccccgattgt  
gtcgacgaaggcttttggctcctctgtcgctgtctcaagcagcatctaaccctgcgtcgccgtttccatttgagGGCAC  
CCTGGAGAACCACCACTTCGCCCACCTGAAGGGCATGCTGGAGCTGTTTCG  
AGGCCAGCAACCTGGGCTTCGAGGGCGAGGACATCCTGGACGAGGCCAA  
GGCCAGCCTGACCCTGGCCCTGCGCGACAGCGGCCACATCTGCTACCCCG  
ACAGCAACCTGAGCCGCGACGTGGTGCACAGCCTGGAGCTGCCCAGCCAC  
CGCCGCGTGCAGTGGTTCGACGTGAAGTGGCAGATCAACGCCTACGAGAA  
GGACATCTGCCGCGTGAACGCCACCCTGCTGGAGCTGGCCAAGCTGAACT  
TCAACGTGGTGCAGGCCAGCTGCAGAAGAACCTGCGCGAGGCCAGCCG  
CTGGTGGGCCAACCTGGgtgagtcgacgagcaagccccggcgatcaggcagcgtgcttgcagatttgact  
tgcaacgccccgattgtgtcgacgaaggcttttggctcctctgtcgctgtctcaagcagcatctaaccctgcgtcgccgtttcc  
atttgagGCATCGCCGACAACCTGAAGTTCGCCCCGCGACCGCCTGGTGGAGT  
GCTTCGCCTGCGCCGTGGGCGTGGCCTTCGAGCCCGAGCACAGCAGCTTC  
CGCATCTGCCTGACCAAGGTGATCAACCTGGTGTGCTGATCATCGACGACGTG  
TACGACATCTACGGCAGCGAGGAGGAGCTGAAGCACTTCACCAACGCCGT  
GGACCGCTGGGACAGCCGCGAGACGGAGCAGCTGCCCCGAGTGCATGAAG  
ATGTGCTTCCAGGTGCTGTACAACACCACCTGCGAGATCGCCCCGCGAGATC  
GAGGAGGAGAACGGCTGGAACCAGGTGCTGCCCCAGCTGACCAAGGTGT  
GGGCCGACTTCTGCAAGGCCCTGCTGGTGGAGGCCGAGTGGTACAACAAG  
AGCCACATCCCCACCCTGgtgagtcgacgagcaagccccggcgatcaggcagcgtgcttgcagatttg  
cttgcagatttgacttgcaacgccccgattgtgtcgacgaaggcttttggctcctctgtcgctgtctcaagcagcatctaaccctgcgtcgccgttt

ccatttcagGAGGAGTACCTGCGCAACGGCTGCATCAGCAGCAGCGTGAGCGT  
GCTGCTGGTGCACAGCTTCTTCAGCATCACCCACGAGGGCACCAAGGAGA  
TGGCCGACTTCCTGCACAAGAACGAGGACCTGCTGTACAACATCAGCCTG  
ATCGTGCGCCTGAACAACGACCTGGGCACCAGCGCCGCCGAGCAGGAGCG  
CGGCGACAGCCCCAGCAGCATCGTGTGCTACATGCGCGAGGTGAACGCCA  
GCGAGGAGACGGCCCGCAAGAACATCAAGGGCATGATCGACAACGCCTGG  
AAGAAGGTGAACGGCAAGTGCTTCACCACCAACCAGGTGCCCTTCCTGAG  
CAGCTTCATGAACAACGCCACCAACATGGCCCGCGTGgtgagcttcgggggttcgag  
caactccagcaacgaacagtcccaagtcaggaatctgcagtcagcctgggcttcggcggtttttcttgggcaaca  
gcttgactcatgccagcgcggcttgccagcctcacttgagctttccagctgctaccagccgggctatacgacagcgaca  
gagccatagcgtggaatcacttatttgggtgccgaagtagcggtcggagcgtgagttcttggtcaagccgccccttatccg  
gttctgtccgtgtctttgtccctcgttcacccttcgcggcacccttcaccccttgcttgcagGCCACAGCCTGT  
ACAAGGACGGCGACGGCTTCGGCGACCAGGAGAAGGGCCCCCGCACCCA  
CATCCTGAGCCTGCTGTTCCAGCCCCTGGTGAATAA
